# Supplementary material for: Effects of gas bubbling for shape, size, and composition changes in Au–Ag bimetallic nanoparticles including polygonal Au seeds under oil-bath heating at 150 °C
Source: Royal Society of Chemistry journal article supplement (doi:10.1039/c1ce05550j), 2011-01-01
Supplement: c1ce05550j.pdf [file c1ce05550j.pdf]

## Supplementary Information

### Effects of gas bubbling for shape, size, and composition changes in Au–Ag bimetallic nanoparticles including polygonal Au seeds under oil-bath heating at 150° C

Md. Jahangir Alam<sup>a</sup> and Masaharu Tsuji<sup>\*a,b</sup>

<sup>a</sup> *Department of Applied Science for Electronics and Materials, Graduate School of Engineering Sciences, Kyushu University, Kasuga 816-8580, Japan*

<sup>b</sup> *Institute for Materials Chemistry and Engineering, Kyushu University, Kasuga 816-8580, Japan*

*\*To whom correspondence should be addressed: E-mail: [tsuji@cm.kyushu-u.ac.jp](mailto:tsuji@cm.kyushu-u.ac.jp)*

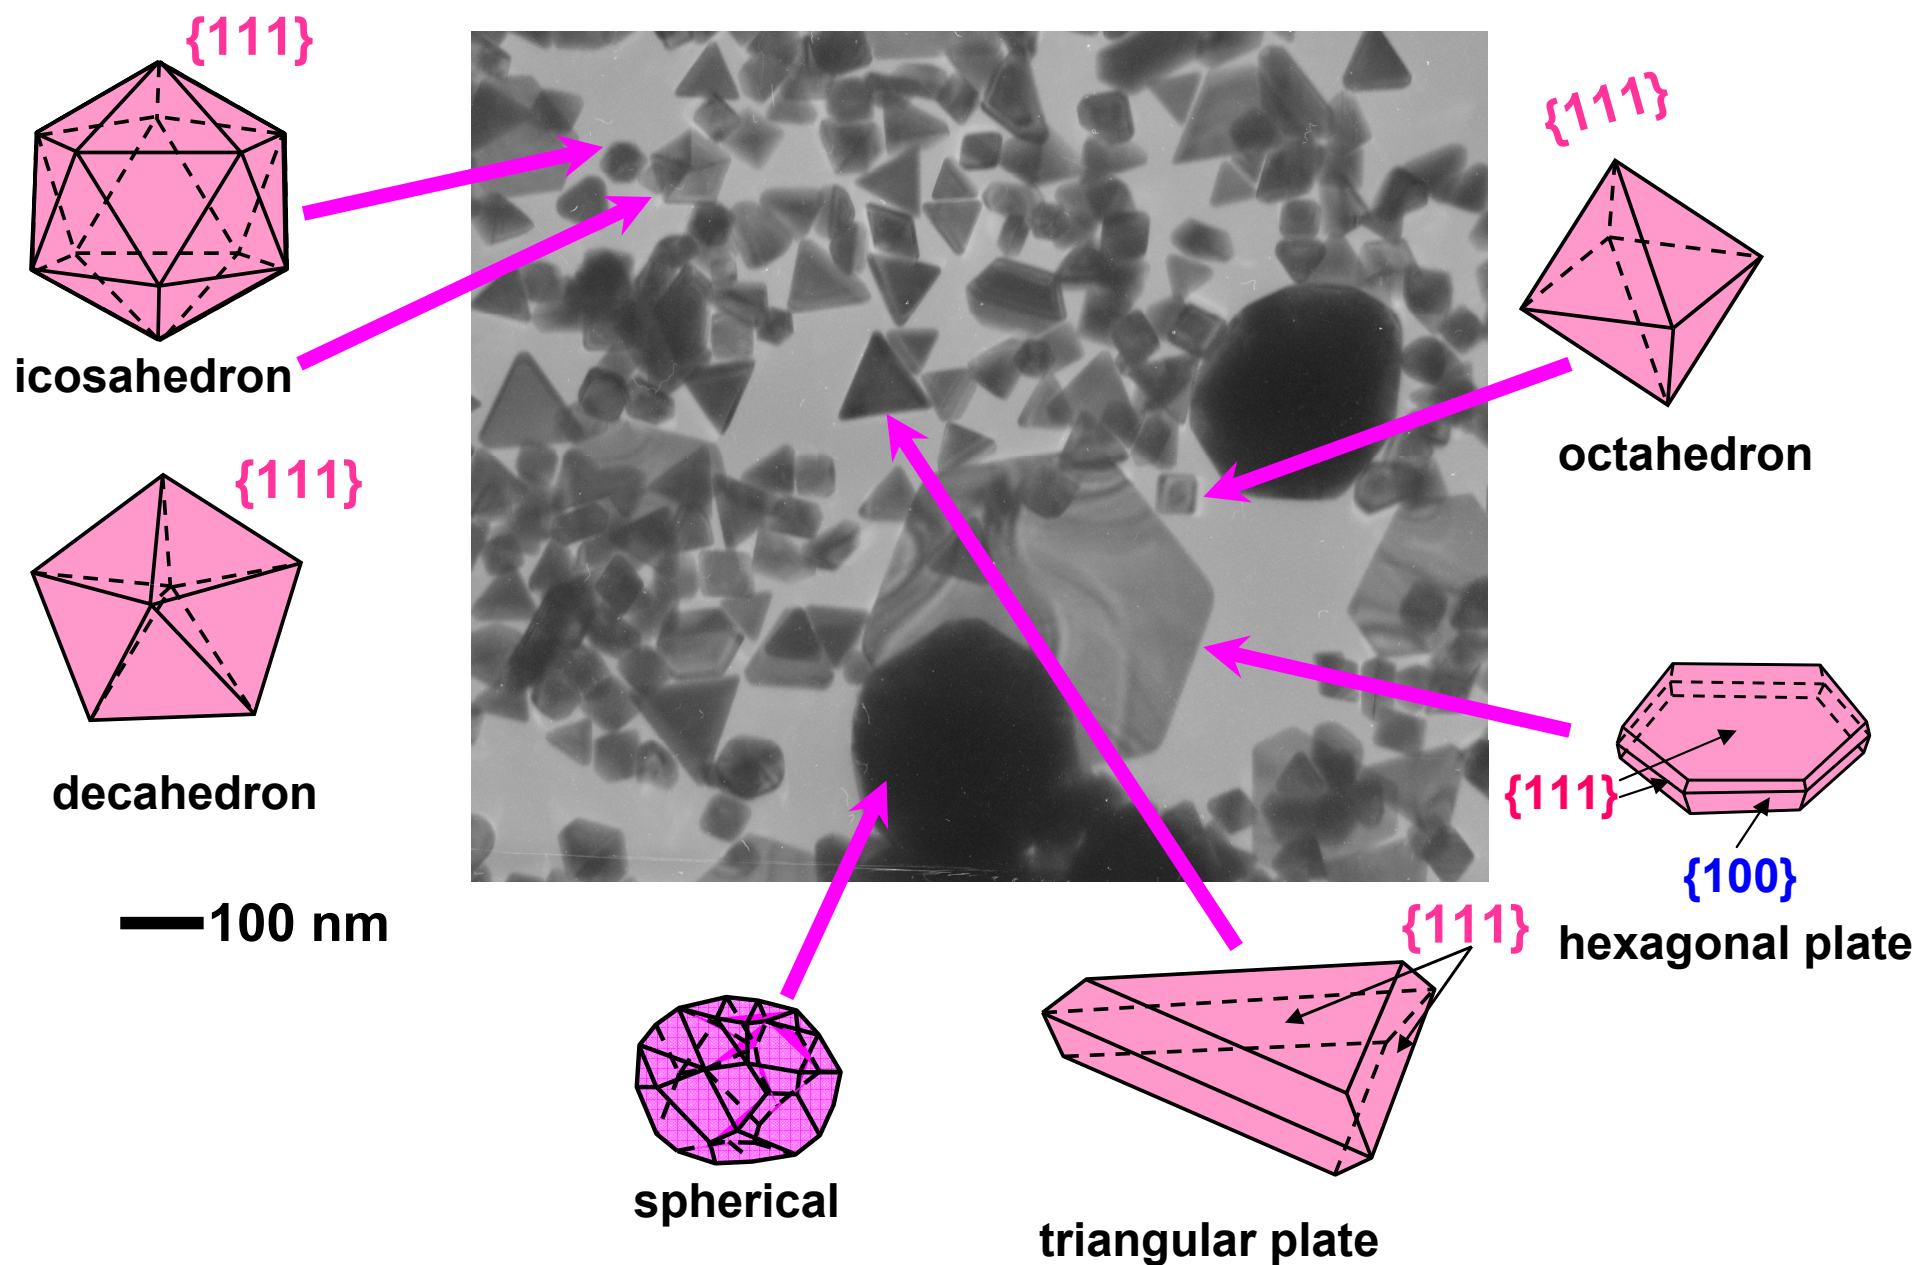

**Fig. S1.** TEM image of typical polygonal Au seeds and their crystal structures.

(a) TEM

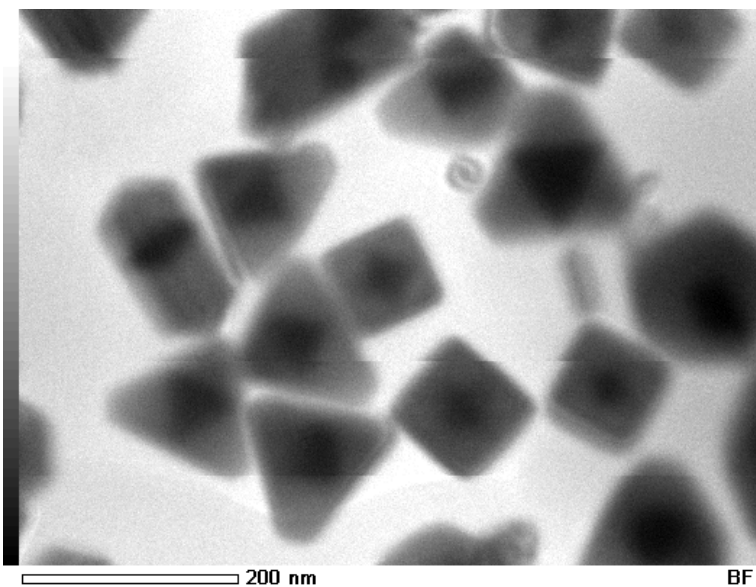

(b) Au component

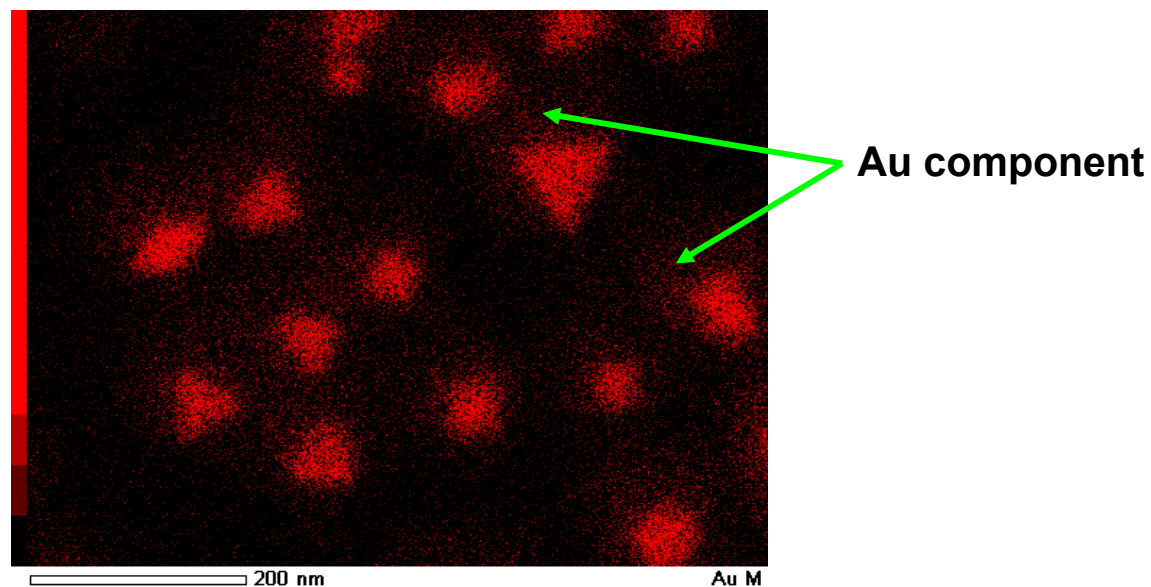

(c) Ag component

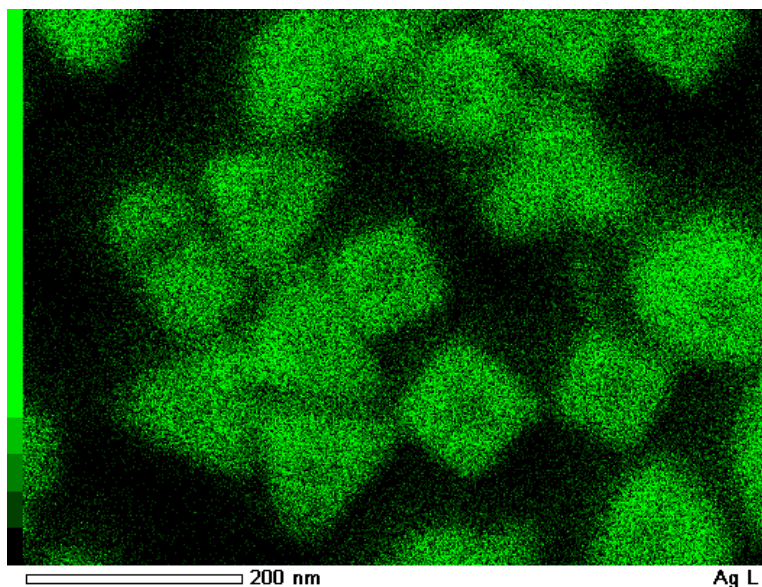

(d) Au/Ag component

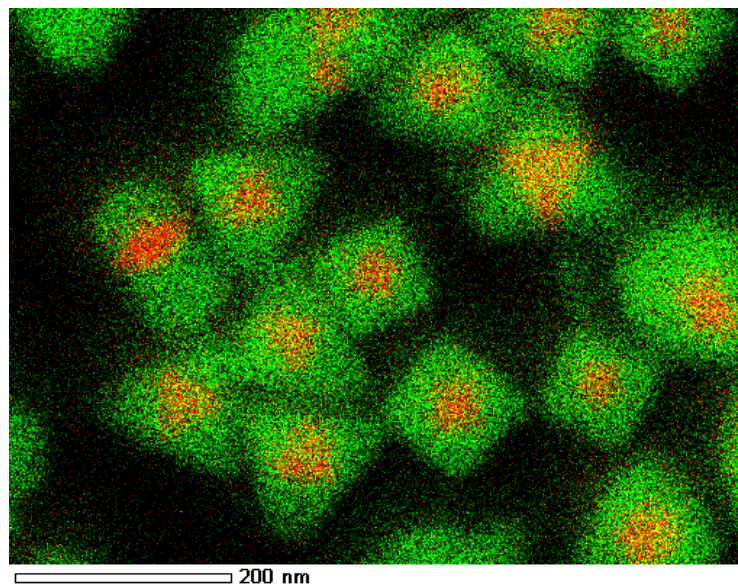

**Fig. S2.** TEM and TEM–EDS data of Au@Ag/Au nanoparticles obtained from Au seeds/AgNO<sub>3</sub>/PVP/EG solution after heating for 10 min under Ar gas bubbling.

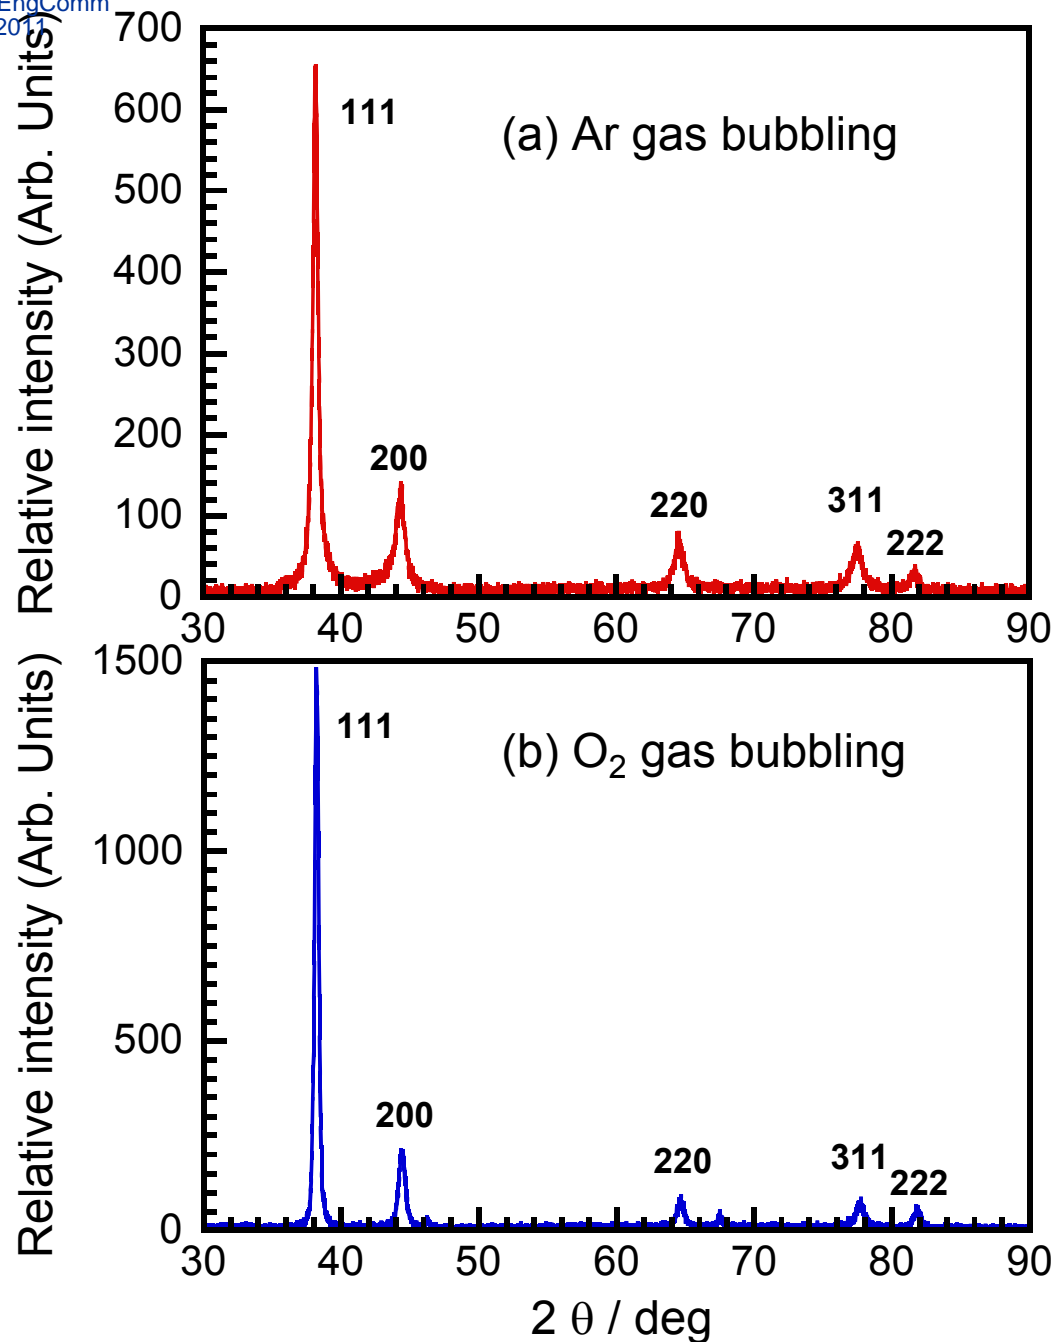

**Fig. S3.** XRD patterns of Au–Ag bimetallic particles obtained from Au seeds/AgNO<sub>3</sub>/PVP/EG solution after heating for 60 min under (a) Ar gas bubbling and (b) O<sub>2</sub> gas bubbling.

(a) TEM

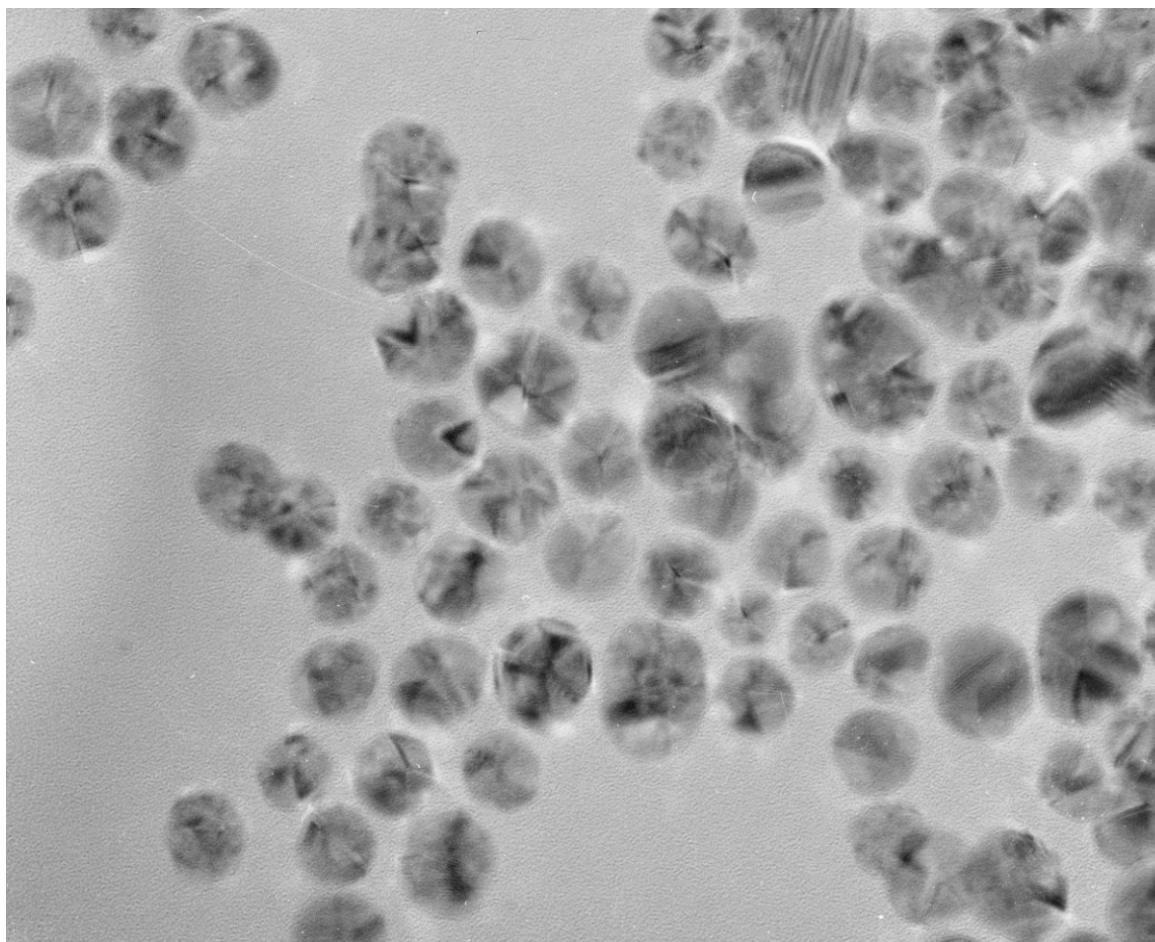

— 20 nm

(b) UV-Vis

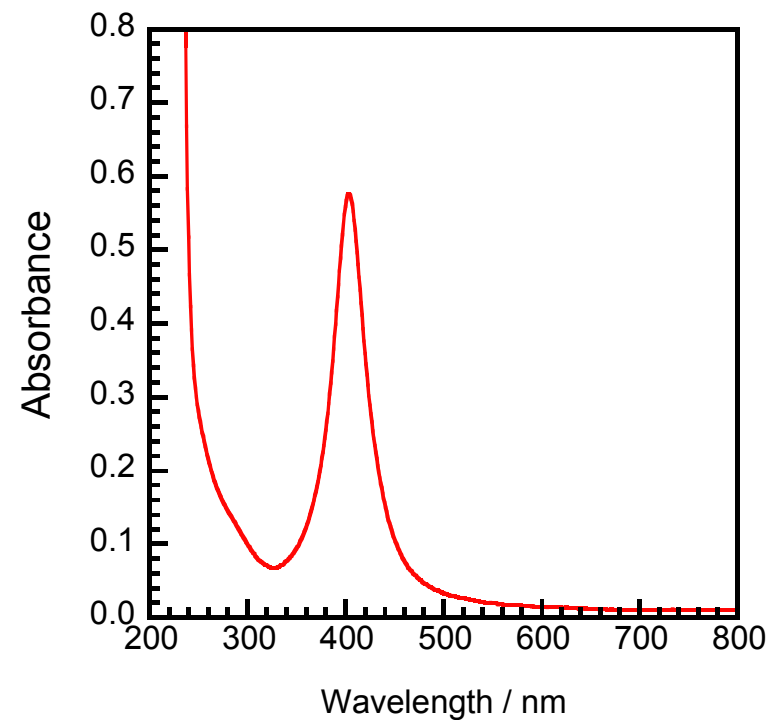

**Fig. S4.** (a) TEM image and (b) UV-vis spectrum of Ag nanoparticles obtained from  $\text{AgNO}_3/\text{PVP}/\text{EG}$  solution after heating for 10 min under Ar gas bubbling.

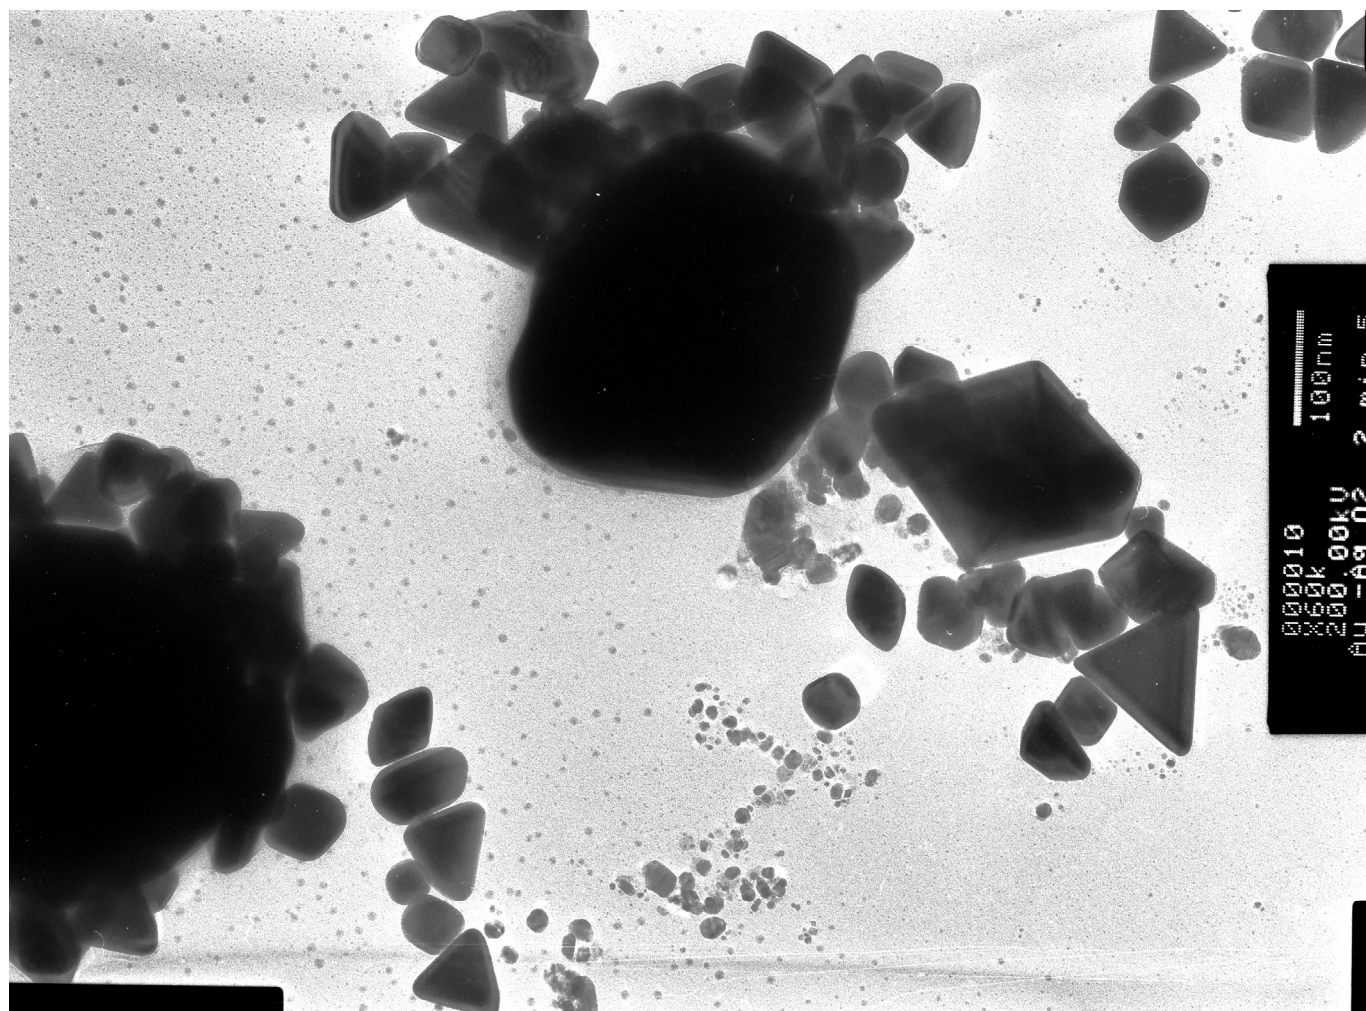

**Fig. S5.** TEM image of Au–Ag bimetallic products obtained from Au seeds/ $\text{AgNO}_3$ /PVP/EG solution after heating for 2 min under  $\text{O}_2$  gas bubbling.

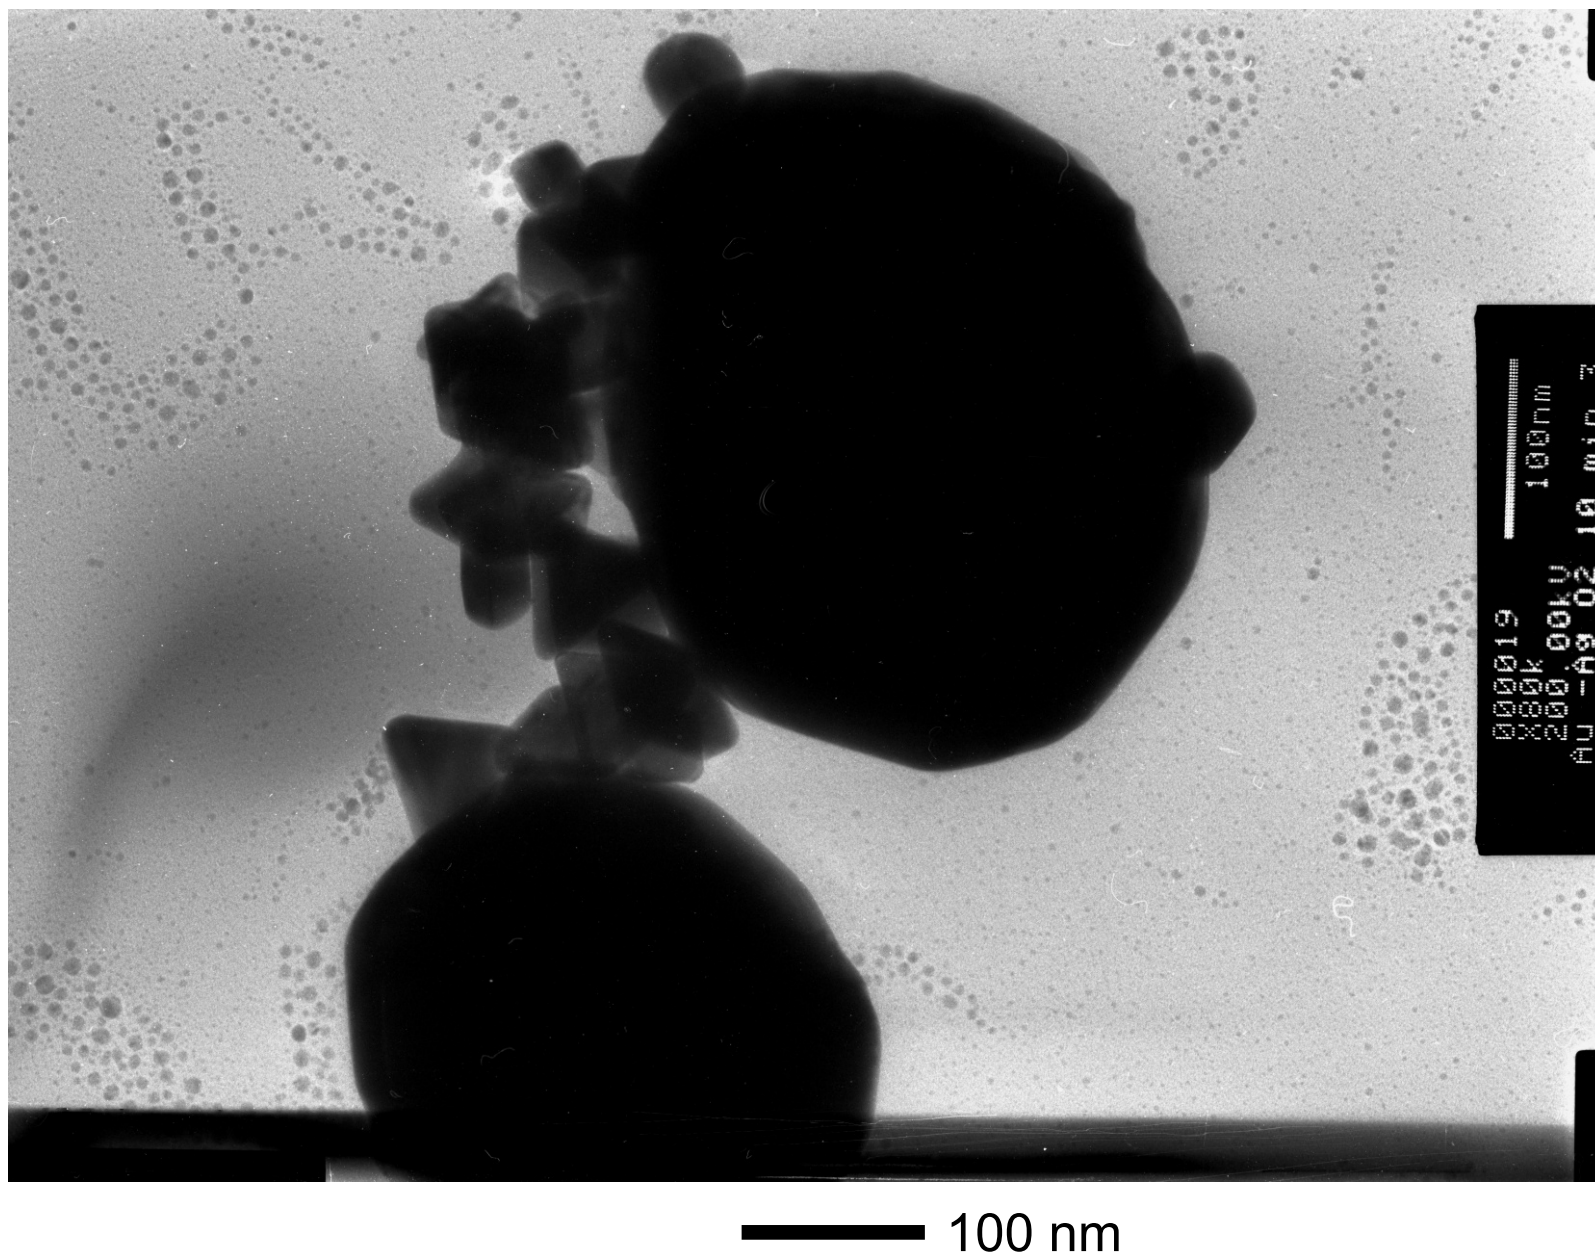

**Fig. S6.** TEM image of Au–Ag bimetallic products obtained from Au seeds/ $\text{AgNO}_3$ /PVP/EG solution after heating for 10 min under  $\text{O}_2$  gas bubbling.

(a) TEM

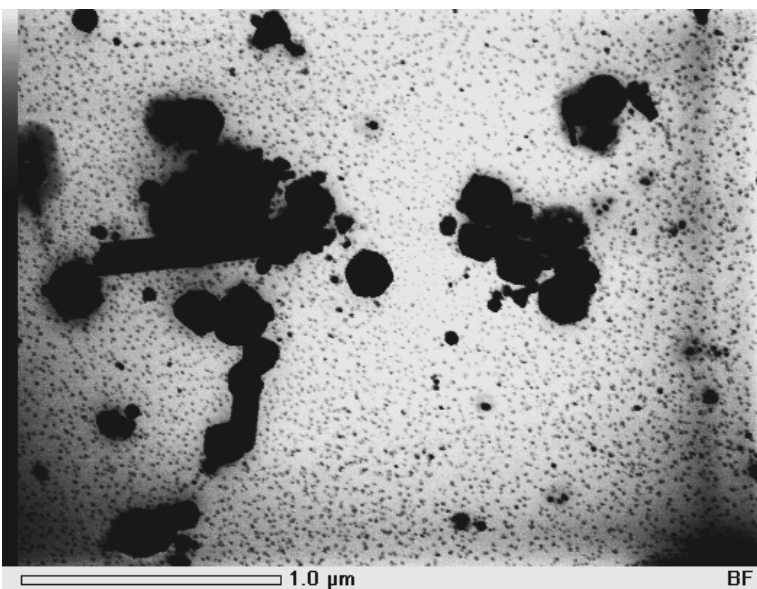

(b) Au component

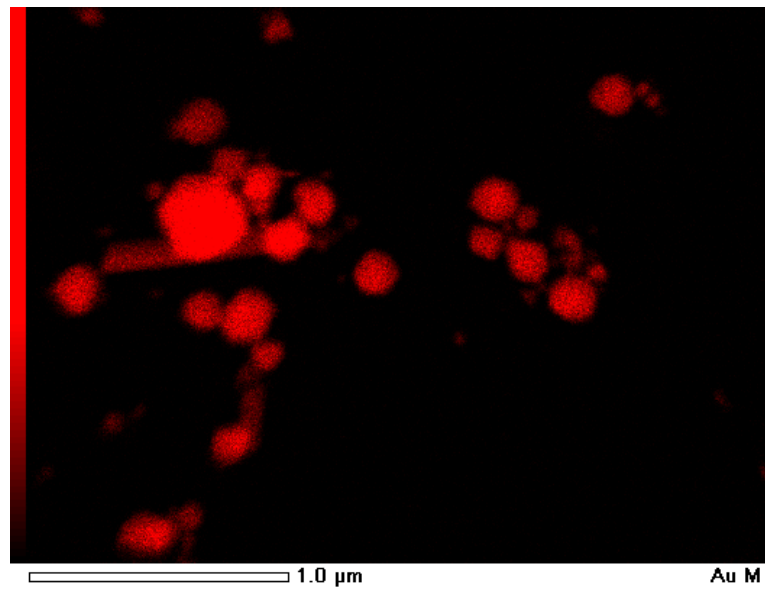

(c) Ag component

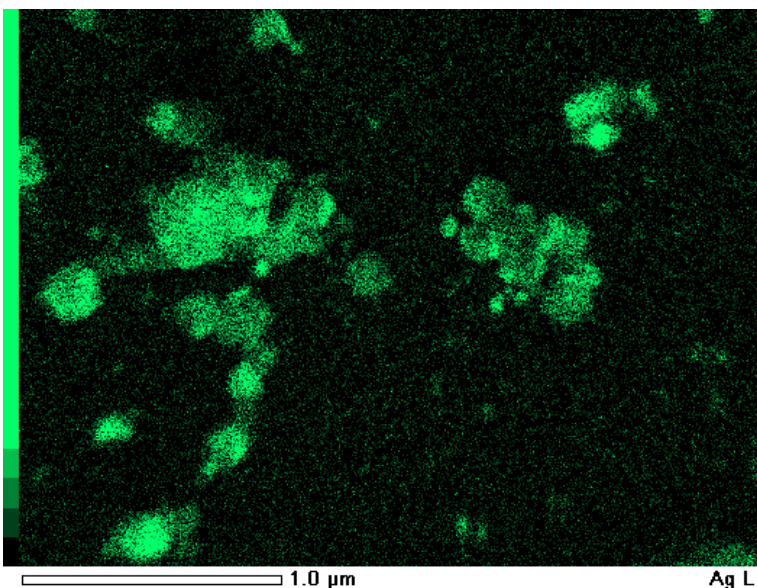

(d) Au/Ag component

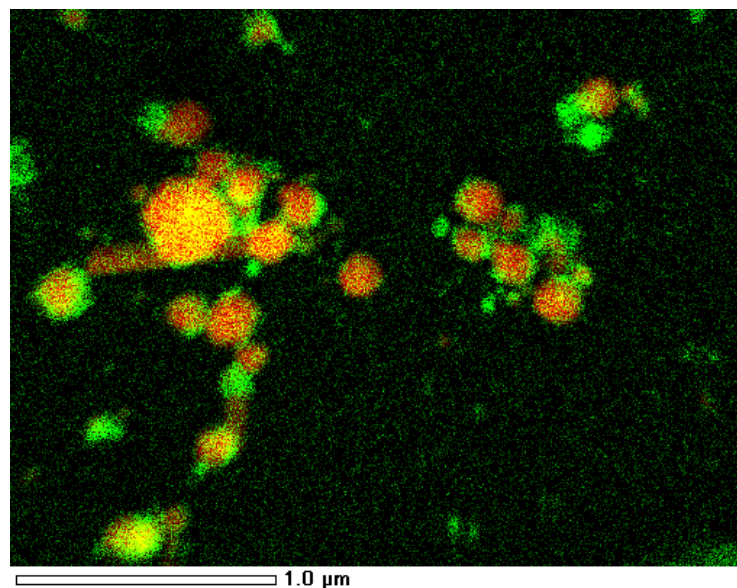

**Fig. S7.** TEM image of Au–Ag bimetallic particles obtained from Au seeds/AgNO<sub>3</sub>/PVP/EG solution after heating for 30 min under O<sub>2</sub> gas bubbling.





(a) TEM

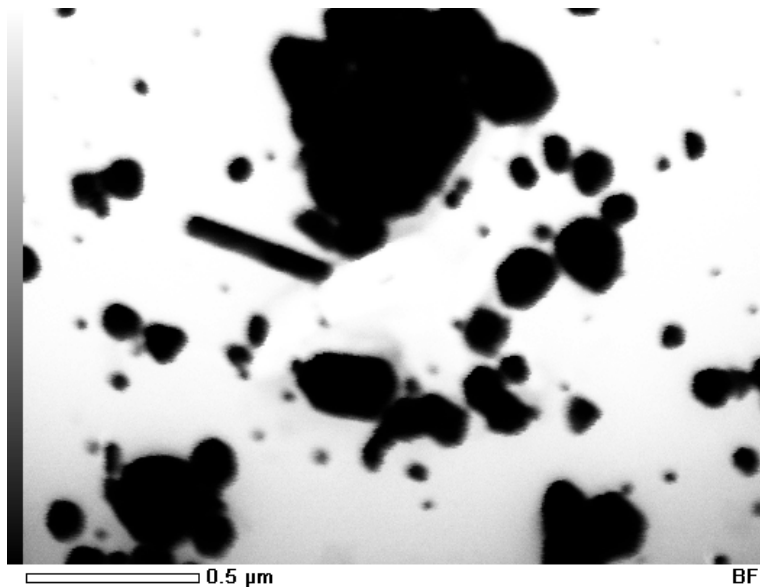

(b) Au component

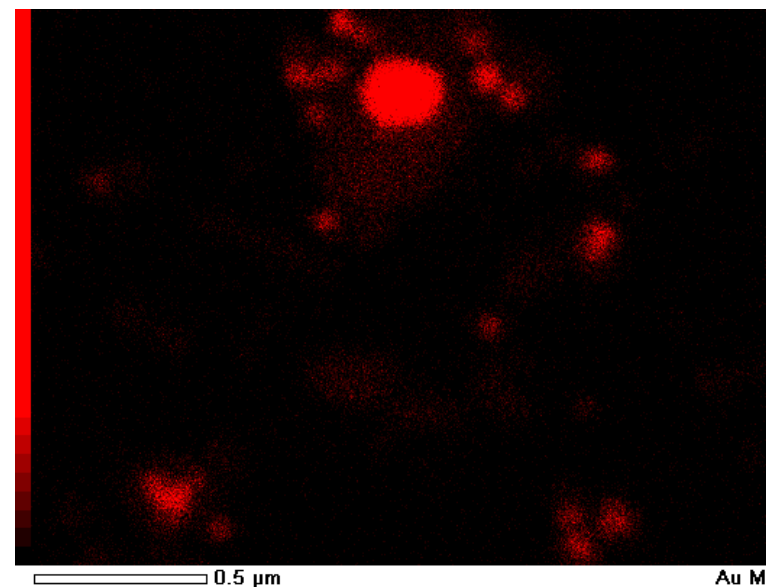

(c) Ag component

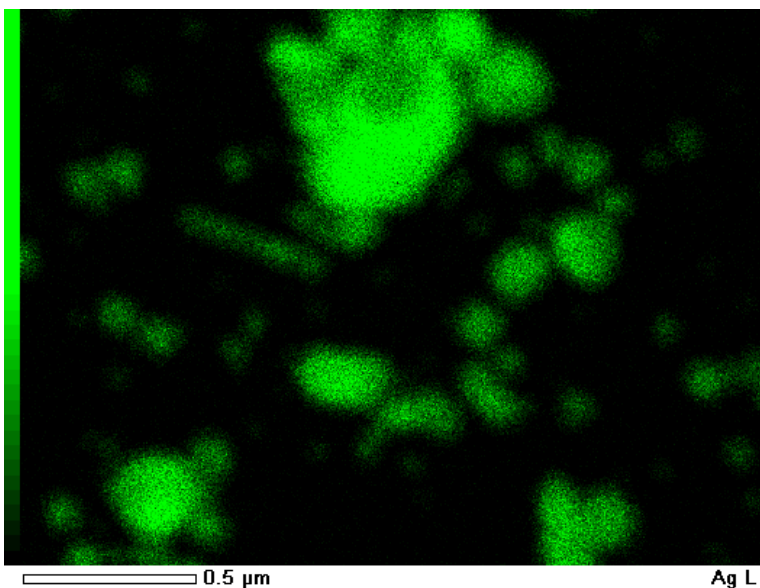

(d) Au/Ag component

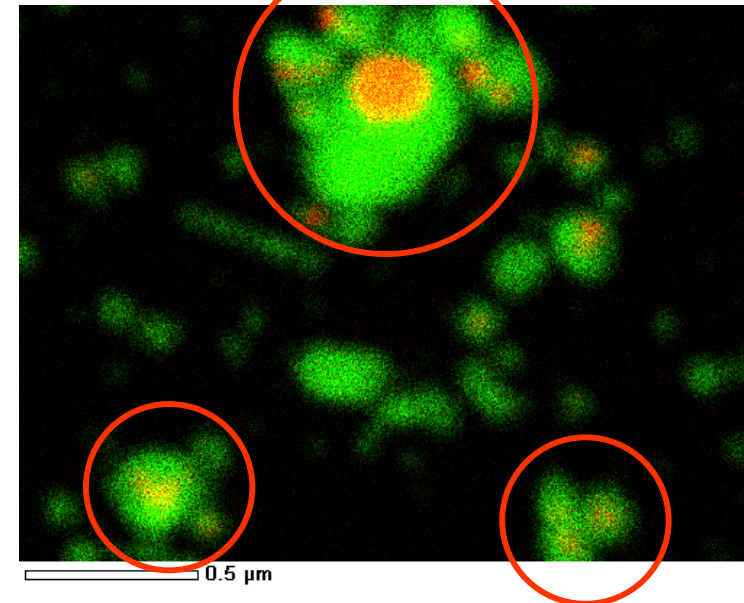

**Fig. S9.** TEM image of Au–Ag bimetallic particles obtained from Au seeds/  
AgNO<sub>3</sub>/PVP/EG solution after heating for 30 min under Ar gas bubbling.
